# Supplementary material
Source: Royal Society of Chemistry journal article supplement (doi:10.1039/d6ja00142d)
Supplement: d6ja00142d1.pdf [file d6ja00142d1.pdf]

1  This figure illustrates that the comparison between the original spectra and the downsampled spectra for the remaining six rock types.

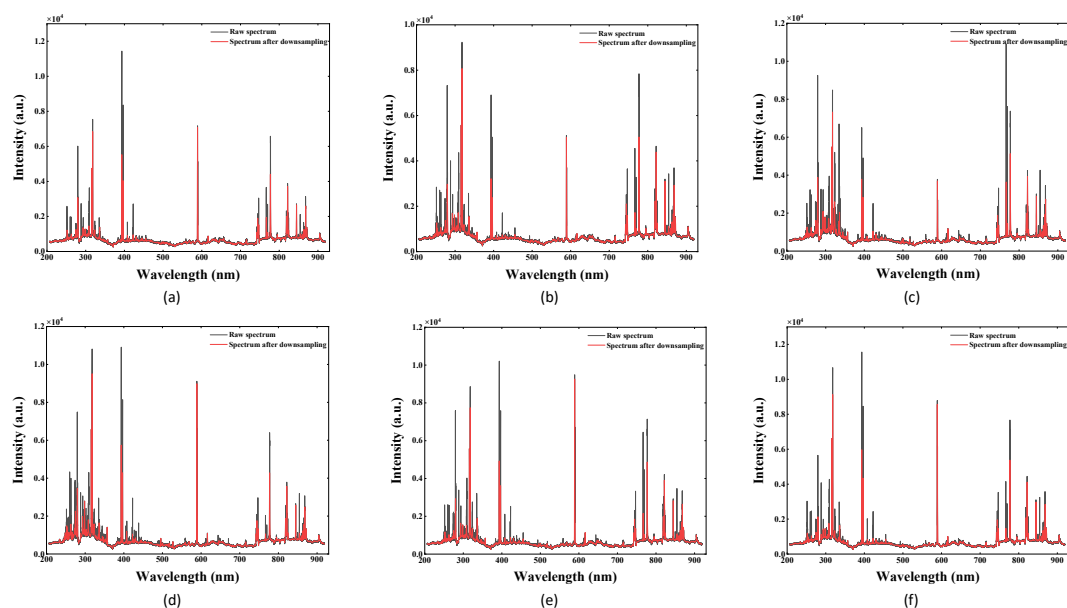

Fig S1 (a)-(f) Comparison of results before and after downsampling of six rock types:(a) Granodiorite, (b) Pyroxenite diorite, (c) Biotite amphibole diorite, (d) Biotite diorite, (e) Diorite, and (f) Quartz diorite.

2  SVM model specific parameters

Table S1 Parameters of the SVM module

|                    | Detail parameters |
|--------------------|-------------------|
| Input data         | 1024×1            |
| Kernel             | RBF kernel        |
| Feature scaling    | StandardScaler    |
| Kernel coefficient | Scale             |
| Class weighting    | Balanced          |

3  1D-CNN model specific parameters

Table S2 Parameters of the 1D-CNN module

|             | Detail parameters    |
|-------------|----------------------|
| Input layer | 1024×1               |
| CNN module  | Numbers of layers: 3 |
|             | Size of kernels: 3×1 |

|                     |                       |
|---------------------|-----------------------|
|                     | Number of kernels: 64 |
| Pooling layer       | Max Pooling           |
|                     | Pool size: 2×1        |
| Activation function | ReLU                  |
| Optimizer           | Adam                  |
| Learning rate       | 0.001                 |
| Weight decay        | 1e-4                  |
| Loss function       | Cross-entropy loss    |
| Batch size          | 8                     |
| Epochs              | 300                   |

---

#### 4□ 2D-CNN model specific parameters

Table S3 Parameters of the 2D-CNN module

|                     | Detail parameters     |
|---------------------|-----------------------|
| Input layer         | (1, 224, 224)         |
| CNN module          | Numbers of layers: 3  |
|                     | Size of kernels: 3×1  |
|                     | Number of kernels: 64 |
| Pooling layer       | Max Pooling           |
|                     | Pool size: 2×1        |
| Activation function | ReLU                  |
| Optimizer           | AdamW                 |
| Learning rate       | 0.001                 |
| Loss function       | Cross-entropy loss    |
| Batch size          | 8                     |
| Epochs              | 300                   |

---

#### 5□ DenseNet121 model specific parameters

Table S4 Parameters of the DenseNet121 module

|                         | Detail parameters                           |
|-------------------------|---------------------------------------------|
| Input layer             | (1, 224, 224)                               |
| First convolution       | Kernel size =7<br>Padding = 3<br>Stride = 2 |
| Optimizer               | AdamW                                       |
| Learning rate           | 0.001                                       |
| Weight decay            | 1e-4                                        |
| Loss function           | Cross-entropy loss                          |
| Learning-rate scheduler | CosineAnnealingLR                           |
| Batch size              | 8                                           |
| Epochs                  | 300                                         |

6  GoogLeNet model specific parameters

Table S5 Parameters of the GoogLeNet module

|                         | Detail parameters                           |
|-------------------------|---------------------------------------------|
| Input layer             | (1, 224, 224)                               |
| Auxiliary classifiers   | Disable                                     |
| First convolution       | Kernel size =7<br>Padding = 3<br>Stride = 2 |
| Classifier dropout      | 0.2                                         |
| Optimizer               | AdamW                                       |
| Learning rate           | 0.001                                       |
| Weight decay            | 1e-4                                        |
| Loss function           | Cross-entropy loss                          |
| Learning-rate scheduler | CosineAnnealingLR                           |
| Batch size              | 8                                           |

Epochs 300

---

7□ MSCNN model specific parameters

Table S6 Parameters of the MSCNN module

---

|                         | Detail parameters                                      |
|-------------------------|--------------------------------------------------------|
| Input layer             | (1, 224, 224)                                          |
| Invalid value handling  | NaN/Inf replaced with 0                                |
| Multi-scale branches    | Parallel Conv2d branches with kernel sizes 3, 5, and 7 |
| Classifier dropout      | 0.2                                                    |
| Base channels           | 16                                                     |
| Block 1                 | 16                                                     |
| Block 2                 | 32                                                     |
| Block 3                 | 64                                                     |
| Block 4                 | 128                                                    |
| Pooling layer           | Max Pooling                                            |
| Dropout                 | 0.3                                                    |
| Optimizer               | AdamW                                                  |
| Learning rate           | 0.001                                                  |
| Weight decay            | 1e-4                                                   |
| Loss function           | Cross-entropy loss                                     |
| Learning-rate scheduler | CosineAnnealingLR                                      |
| Batch size              | 8                                                      |
| Epochs                  | 300                                                    |

---
